# Supplementary material for: Isomers of C12N12 as potential hydrogen storage materials and the effect of the electric field therein
Source: Royal Society of Chemistry journal article supplement (doi:10.1039/c3ra00013c), 2013-01-01
Supplement: c3ra00013c.pdf [file c3ra00013c.pdf]

## Supporting Information

### Isomers of C<sub>12</sub>N<sub>12</sub> as Potential Hydrogen Storage Materials and the Effect of Electric Field Therein

S. Mondal<sup>a</sup>, K. Srinivasu<sup>b</sup>, Swapan K. Ghosh<sup>\*b</sup>, and P. K. Chattaraj<sup>\*a</sup>

<sup>a</sup> Department of Chemistry and Center for Theoretical Studies, Indian Institute of Technology, Kharagpur, 721302, India. E-mail: [pkc@chem.iitkgp.ernet.in](mailto:pkc@chem.iitkgp.ernet.in), Telephone: +91 3222 283304

<sup>b</sup> Theoretical Chemistry Section, Bhabha Atomic Research Centre, Mumbai, 400 085, India. E-mail: [skghosh@barc.gov.in](mailto:skghosh@barc.gov.in)

**Table S1: Binding energies (E, kcal/mol) of nH<sub>2</sub>@C<sub>12</sub>N<sub>12</sub>-A, nH<sub>2</sub>@C<sub>12</sub>N<sub>12</sub>-B, and nH<sub>2</sub>@C<sub>12</sub>N<sub>12</sub>-C with increasing values of n**

| No. of H <sub>2</sub> Molecules (n) | nH <sub>2</sub> @C <sub>12</sub> N <sub>12</sub> -A | nH <sub>2</sub> @C <sub>12</sub> N <sub>12</sub> -B | nH <sub>2</sub> @C <sub>12</sub> N <sub>12</sub> -C |
|-------------------------------------|-----------------------------------------------------|-----------------------------------------------------|-----------------------------------------------------|
|                                     | Average Binding Energy (E, kcal/mol)                | Average Binding Energy (E, kcal/mol)                | Average Binding Energy (E, kcal/mol)                |
| 1                                   | 1.43                                                | 0.89                                                | 1.34                                                |
| 2                                   | 1.24                                                | 1.30                                                | 1.18                                                |
| 3                                   | 1.19                                                | 1.60                                                | 1.18                                                |
| 4                                   | 1.21                                                | 1.41                                                | 1.19                                                |
| 5                                   | 1.21                                                | 1.31                                                | 1.24                                                |
| 6                                   | 1.18                                                | 1.24                                                | 1.21                                                |
| 7                                   | 1.18                                                | 1.18                                                | 1.21                                                |
| 8                                   | 1.20                                                | 1.17                                                | 1.19                                                |
| 9                                   | 1.19                                                | 1.13                                                | 1.18                                                |
| 10                                  | 1.16                                                | 1.11                                                | 1.16                                                |
| 11                                  | 1.16                                                | 1.06                                                | 1.11                                                |
| 12                                  | 1.17                                                | 1.03                                                | 1.05                                                |

Method = DFT-D-B3LYP/6-31G(d)

**Table S2: Hardness ( $\eta$ , eV) of  $C_{12}N_{12}$  isomers and  $H_2$  loaded  $C_{12}N_{12}$  isomers**

| No. of $H_2$ Molecules<br>(n) | Hardness ( $\eta$ , eV) |                        |                        |
|-------------------------------|-------------------------|------------------------|------------------------|
|                               | $nH_2@C_{12}N_{12}$ -A  | $nH_2@C_{12}N_{12}$ -B | $nH_2@C_{12}N_{12}$ -C |
| 0                             | 3.879                   | 2.519                  | 1.724                  |
| 1                             | 3.881                   | 2.515                  | 1.721                  |
| 2                             | 3.879                   | 2.520                  | 1.705                  |
| 3                             | 3.878                   | 2.525                  | 1.708                  |
| 4                             | 3.886                   | 2.524                  | 1.711                  |
| 5                             | 3.882                   | 2.527                  | 1.719                  |
| 6                             | 3.878                   | 2.526                  | 1.716                  |
| 7                             | 3.882                   | 2.528                  | 1.714                  |
| 8                             | 3.884                   | 2.525                  | 1.757                  |
| 9                             | 3.889                   | 2.525                  | 1.713                  |
| 10                            | 3.894                   | 2.524                  | 1.725                  |
| 11                            | 3.898                   | 2.524                  | 1.713                  |
| 12                            | 3.903                   | 2.527                  | 1.725                  |
